# Supplementary material for: Mutual Shaping in the Design of Socially Assistive Robots: A Case Study on Social Robots for Therapy
Source: Springer Nature journal article supplement (doi:10.1007/s12369-019-00536-9), 2019-03-07
Supplement: MOESM1 [file 16533534]

## **Mutual Shaping in the Design & Use of Socially Assistive Robots: A Case Study on Social Robots for Therapy**

International Journal of Social Robotics

Katie Winkle (k.winkle@bristol.ac.uk)\*, Praminda Caleb-Solly\*, Ailie Turton^ & Paul Bremner\*

\*Bristol Robotics Laboratory, UK

^Allied Health Professions, University of the West of England, UK

*Electronic Supplementary Material 3: Full coding scheme applied to focus group transcripts.*

First Level Coding Scheme. Those marked\* have second level codes presented below:

| Code                                   | Description                                                                                                                                                           |
|----------------------------------------|-----------------------------------------------------------------------------------------------------------------------------------------------------------------------|
| [A] Application of Robots in Therapy   | Direct suggestions or inferred applications/ functionalities of SARs in therapy ( <i>in post-demo discussion</i> )                                                    |
| [A] Therapist Opinion of Social Robots | Any feedback on social robots or their use in therapy – could be appearance, functionality etc. from the therapists’ point of view ( <i>in post-demo discussion</i> ) |
| [A] User Opinion of Social Robots      | As above but with therapist referencing user response                                                                                                                 |
| [B] Application of Robots in Therapy   | Direct suggestions or inferred applications/ functionalities of SARs in therapy ( <i>in pre-demo discussion</i> )                                                     |
| [B] Therapist Opinion of Social Robots | Any feedback on social robots or their use in therapy – could be appearance, functionality etc. from the therapists’ point of view ( <i>in pre-demo discussion</i> )  |
| [B] User Opinion of Social Robots      | As above but with therapist referencing user response                                                                                                                 |
| Demo Feedback                          | Feedback on any aspect of the robot demonstrations                                                                                                                    |
| Factors relating to engagement         | Anything about the factors which impact on adherence, including which factors are most important (e.g. around the ranking exercise)                                   |
| Importance of self-practice            | Any reflections on how important such exercises are to the overall therapy programme                                                                                  |
| Measuring motivation or engagement     | Measures or indicators of how motivated/engaged a service user is                                                                                                     |
| Mutual/ Social Shaping                 | Comments regarding societal influences in therapy, or issues likely to impact on real-world SAR deployment in therapy                                                 |
| Personalised Approaches                | Comments regarding how therapy delivery or therapist approach might be adapted or personalised based on the service user                                              |
| Prescription of Self-Practice          | Anything describing the prescription of or detail about the type of self-practice exercises given to service users                                                    |
| Reporting of Self-Practice             | Anything about whether the therapist monitors self-practice, or ways in which it might be measured                                                                    |
| Robot Requirements                     | Anything around perceived difficulties the robot might face or useful references to what sensor/data collection capabilities might be required                        |
| Therapist Behaviour or Role            | Anything about how the therapist might have an impact on motivation or engagement i.e. through taking a particular approach or adjusting their behaviour              |

Second Level Coding Nodes. Those marked^ have third level codes presented below:

| First Level/ ‘Parent’ Code             | Second Level/ ‘Child’ Codes                                                                                                                     |
|----------------------------------------|-------------------------------------------------------------------------------------------------------------------------------------------------|
| [A/B] Application of Robots in Therapy | Calming or anxiety<br>Demonstrating or showing task<br>Engagement in therapy^<br>Interpretation and Translation<br>Medication<br>Tele-operation |

|                                          |                                                                                                                                                                                                                                                                                    |
|------------------------------------------|------------------------------------------------------------------------------------------------------------------------------------------------------------------------------------------------------------------------------------------------------------------------------------|
|                                          | Therapist or other feedback^<br>Therapist or other training<br>User feedback                                                                                                                                                                                                       |
| [A/B] Therapist Opinion of Social Robots | Positive<br>Negative                                                                                                                                                                                                                                                               |
| [A/B] User Opinion of Social Robots      | Positive<br>Negative                                                                                                                                                                                                                                                               |
| Factors relating to engagement           | Cognition<br>Demographics<br>Dynamic & individual<br>Ease of access<br>Enjoyment<br>External feedback / encouragement / information^<br>Memory<br>Mental health<br>Mood & emotional state<br>Routine<br>Self-efficacy & expectations & ownership<br>Severity of ailment<br>Social^ |
| Therapist Behaviour or Role              | Boosting intrinsic motivation^<br>Feedback^<br>Make sessions enjoyable<br>Observe & react to patient<br>Persuasion & social influence / social interaction^<br>Scheduling                                                                                                          |

Third Level Coding Nodes:

| First Level/ 'Parent' Code                      |                                                                                                        |
|-------------------------------------------------|--------------------------------------------------------------------------------------------------------|
| Second Level/ 'Child' Code                      | Third Level/ 'Grandchild' Codes                                                                        |
| [A/B] Application of Robots in Therapy          |                                                                                                        |
| Engagement in therapy                           | Improving task value<br>Prompting and facilitating<br>Robot as third party<br>Robot influence          |
| Therapist or other feedback                     | Accurate reporting<br>Quality/ ability of patient activity<br>Useful data                              |
| Factors relating to engagement                  |                                                                                                        |
| External feedback / encouragement / information | Progress based<br>Effort based/ encouragement<br>Functional/ medical purpose/ understanding            |
| Social                                          | Social influence/ pressure<br>Social support                                                           |
| Therapist Behaviour or Role                     |                                                                                                        |
| Boosting intrinsic motivation                   | Frame in term of functional goals<br>Functional/ intrinsic motivators<br>Improve patient understanding |
| Feedback                                        | Effort based                                                                                           |

|                                                    |                                                              |
|----------------------------------------------------|--------------------------------------------------------------|
|                                                    | Feedback based                                               |
| Persuasion & social influence / social interaction | `Cajoling' & accountability<br>Expert support<br>Interaction |
