# Supplementary material for: Mutual Shaping in the Design of Socially Assistive Robots: A Case Study on Social Robots for Therapy
Source: Springer Nature journal article supplement (doi:10.1007/s12369-019-00536-9), 2019-03-07
Supplement: MOESM2 [file 16533534]

## **Mutual Shaping in the Design & Use of Socially Assistive Robots: A Case Study on Social Robots for Therapy**

International Journal of Social Robotics

Katie Winkle (k.winkle@bristol.ac.uk)\*, Praminda Caleb-Solly\*, Ailie Turton^ & Paul Bremner\*

\*Bristol Robotics Laboratory, UK

^Allied Health Professions, University of the West of England, UK

*Electronic Supplementary Material 1: Pre-Focus Group Acceptance Questionnaire*

# Social Robot Questionnaire 1

**Project Title:** Learning How to Help: Social Robots in Therapy

**Study:** Study with Therapists

Name: .....

Social robots are those that can take part in social interactions with humans. They might exhibit human-social characteristics such as expressing and perceiving emotions, making conversation, establishing/maintaining social relationships, using natural cues (e.g. gaze, gesturing) and exhibiting a personality/character [1]. Social robots might be humanoid/resemble some human characteristics but this is not always the case. A range of social robots are shown below to demonstrate this.

[1] Fong, T., Nourbakhsh, I. and Dautenhahn, K., 2003. A survey of socially interactive robots. *Robotics and autonomous systems*, 42(3), pp.143-166.

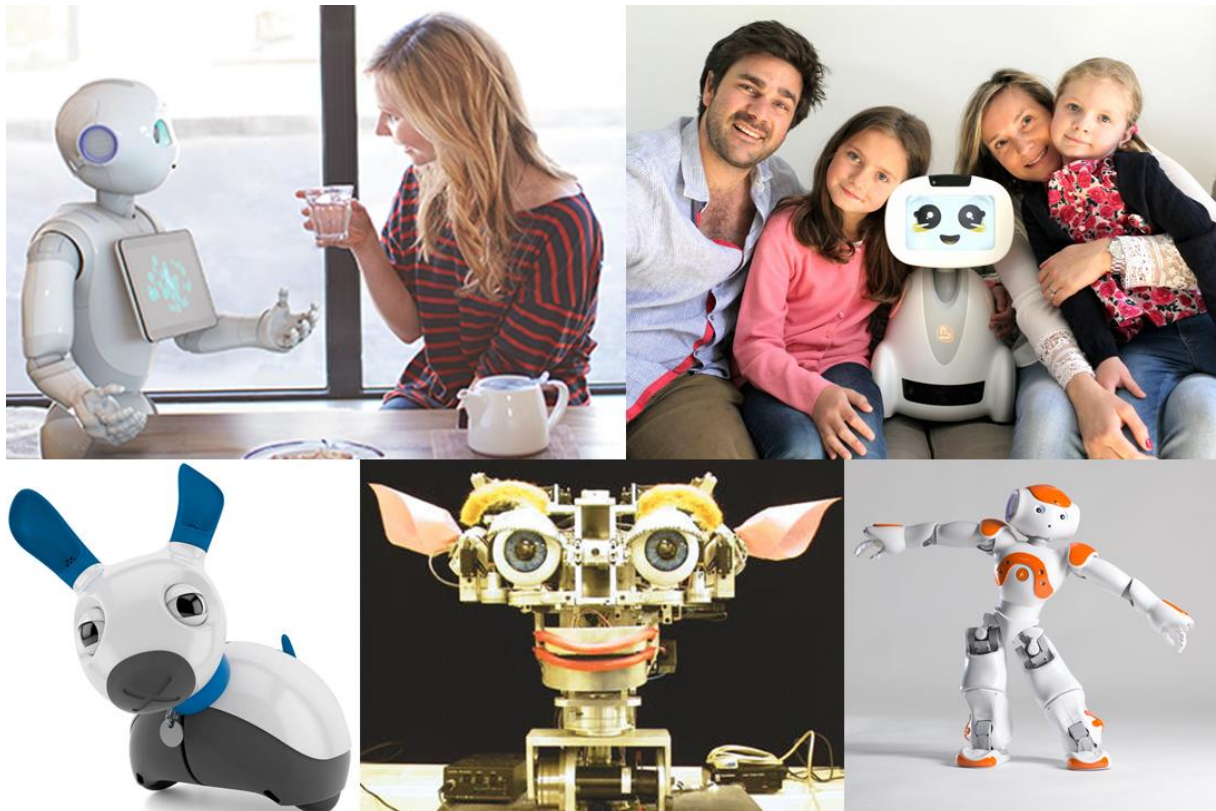

Figure 1: A selection of social robots

Please indicate how much you agree or disagree with the following statements by ticking the appropriate boxes which are ordered from strongly disagree to strongly agree with neither agree nor disagree in the middle:

|                                                                                                       | Strongly Disagree | Disagree | Neither | Agree | Strongly Agree |
|-------------------------------------------------------------------------------------------------------|-------------------|----------|---------|-------|----------------|
| I feel apprehensive about the use of social robots in therapy                                         |                   |          |         |       |                |
| Social robots are somewhat intimidating to me                                                         |                   |          |         |       |                |
| I think social robots might be somewhat intimidating to service users                                 |                   |          |         |       |                |
| I think using social robots in therapy is a good idea                                                 |                   |          |         |       |                |
| I think using social robots would make therapy more engaging for the service user                     |                   |          |         |       |                |
| A social robot would be useful in supporting a therapy programme                                      |                   |          |         |       |                |
| I think that use of a social robot could improve the positive outcomes/success of a therapy programme |                   |          |         |       |                |

A social robot would be **most** useful (please choose one):

When I am working with service users

OR

When service users are working alone
