# Supplementary material for: Mutual Shaping in the Design of Socially Assistive Robots: A Case Study on Social Robots for Therapy
Source: Springer Nature journal article supplement (doi:10.1007/s12369-019-00536-9), 2019-03-07
Supplement: MOESM3 [file 16533534]

## **Mutual Shaping in the Design & Use of Socially Assistive Robots: A Case Study on Social Robots for Therapy**

International Journal of Social Robotics

Katie Winkle (k.winkle@bristol.ac.uk)\*, Praminda Caleb-Solly\*, Ailie Turton^ & Paul Bremner\*

\*Bristol Robotics Laboratory, UK

^Allied Health Professions, University of the West of England, UK

*Electronic Supplementary Material 2: Focus Group Topic Guide*

|                                       |                                                                                                                                                                                                                                                                                                                                                                                                                                                                                                                                                                                                                                                                                                                                                                                                                                                                                                                                                                                                                                                                                                                                                                                                                                                                                                                                                                                                                                                                               |                                                                                                                                                                               |
|---------------------------------------|-------------------------------------------------------------------------------------------------------------------------------------------------------------------------------------------------------------------------------------------------------------------------------------------------------------------------------------------------------------------------------------------------------------------------------------------------------------------------------------------------------------------------------------------------------------------------------------------------------------------------------------------------------------------------------------------------------------------------------------------------------------------------------------------------------------------------------------------------------------------------------------------------------------------------------------------------------------------------------------------------------------------------------------------------------------------------------------------------------------------------------------------------------------------------------------------------------------------------------------------------------------------------------------------------------------------------------------------------------------------------------------------------------------------------------------------------------------------------------|-------------------------------------------------------------------------------------------------------------------------------------------------------------------------------|
| <p>Before the Focus Group Session</p> | <p>Information sheet<br/> Consent form<br/> Demographics/therapist information collection<br/> Acceptance measure</p>                                                                                                                                                                                                                                                                                                                                                                                                                                                                                                                                                                                                                                                                                                                                                                                                                                                                                                                                                                                                                                                                                                                                                                                                                                                                                                                                                         |                                                                                                                                                                               |
| <p>Focus Group [Approx 1 hr]</p>      | <p><b>Welcome &amp; Introduction [5 mins]</b><br/> <i>Welcome and explain that ‘we are going to start the focus group by discussing some aspects of therapy that I am interested in. Later we will take a break I will talk a bit more about the work I am doing but I want to get your views on a few things before we talk too much about that’.</i><br/> Housekeeping:</p> <ul style="list-style-type: none"> <li>• Collect signed consent forms</li> <li>• Name labels</li> <li>• Make participants aware when turning on audio equipment (and hence withdrawal issue)</li> </ul>                                                                                                                                                                                                                                                                                                                                                                                                                                                                                                                                                                                                                                                                                                                                                                                                                                                                                         |                                                                                                                                                                               |
|                                       | <p><b>Pre-Demo Discussion [30 mins]</b><br/> Topic Guide:</p> <ul style="list-style-type: none"> <li>• Round the group introductions – name and area(s) worked in/typical service user(s) worked with</li> <li>• [Expert establishment] <i>‘What are your main goals when working with service users?’</i></li> <li>• [Robot images on screen] Use of robots in supporting a therapy program – <i>‘What do you think about using robots to support a therapy program? How do you think that robots might be able to do that?’</i></li> <li>• Self-practice as part of a therapy regime – <i>‘Do you prescribe self-directed exercises/tasks for your service users to complete at home? What might these be? What is the importance of such exercises?’</i></li> <li>• Reporting of self-practice – <i>‘Do you ask service users to report back or keep a record of self-practice? Do you think this is accurate?’</i></li> <li>• Engagement and motivation – <i>‘How do you monitor service users’ engagement? Do you often find yourself trying to motivate service users? How might you try to do that?’</i></li> <li>• <b>[Post it note exercise]</b> Factors affecting compliance with self-practice – <i>‘What kind of factors do you think affect service users’ compliance with self-practice exercises? The literature suggests... (on screen) Use the post it notes to rank these, as well as come up with any additional factors you can think of.’</i></li> </ul> |                                                                                                                                                                               |
|                                       | <p><b>Project Presentation &amp; Demo [20 mins]</b></p>                                                                                                                                                                                                                                                                                                                                                                                                                                                                                                                                                                                                                                                                                                                                                                                                                                                                                                                                                                                                                                                                                                                                                                                                                                                                                                                                                                                                                       |                                                                                                                                                                               |
|                                       | <p style="text-align: center;"><b>[1] Exercise Based</b><br/> Pepper guides user through repetitions of a simple arm exercise.</p>                                                                                                                                                                                                                                                                                                                                                                                                                                                                                                                                                                                                                                                                                                                                                                                                                                                                                                                                                                                                                                                                                                                                                                                                                                                                                                                                            | <p style="text-align: center;"><b>[2] Task Based</b><br/> Pepper prompts user through a sequence based task e.g. making a cup of tea or preparing a microwave ready meal.</p> |

**Post-Demo Discussion [10 mins]**

Topic Guide:

- Demo feedback – *‘Firstly I would like to get your feedback on the demos – these are really my first attempt at what a robot coach might look like. What do you think? How would you have done it differently?’*
- Revisit use of robots in supporting a therapy program – *‘Now that you have seen the demonstrations, I’d like to discuss again your thoughts on using robots in therapy and how that might be beneficial. What would a robot aid look like, how could it help?’*
- Useful data that could be collected by the robot for use by the therapist – *‘Using a robot as well as other sensor systems it is possible to collect a huge range of data from the service user. Thinking about the measures you might use to monitor service user progress, what information is likely to be most useful to you?’*

**Thank you/Debrief**

Housekeeping:

- Acceptance measure
